# Supplementary material
Source: publisher site journal article supplement (https://www.dovepress.com/article/119632)
Supplement: Supplementary file 1 [file get_supplementary_file.php]

## Supplementary Data

**eTable 1:** List of tests and associated NPU codes and analysis numbers.

**eTable 2:** List of disease categories and associated ICD-8 and ICD-10 codes.

**eTable 3:** List of drugs and associated ATC-codes.

**eTable 4:** Baseline characteristics for schizophrenia patients with and without metabolic blood tests.

**eTable 5:** Baseline characteristics for people with schizophrenia with baseline metabolic blood tests by previous antipsychotic drug prescription(s).

**eTable 6:** Baseline characteristics for people with schizophrenia with baseline metabolic blood tests by gender and previous antipsychotic drug prescription(s).

**eTable 1: List of tests and associated NPU codes and analysis numbers.**

| Tests                                                                                                                                                                             | NPU codes and analysis numbers                                                                                                                                                                                                                                                                                                                                                                                                                                                                                                                                                                                                                                                                                                                              |
|-----------------------------------------------------------------------------------------------------------------------------------------------------------------------------------|-------------------------------------------------------------------------------------------------------------------------------------------------------------------------------------------------------------------------------------------------------------------------------------------------------------------------------------------------------------------------------------------------------------------------------------------------------------------------------------------------------------------------------------------------------------------------------------------------------------------------------------------------------------------------------------------------------------------------------------------------------------|
| <b>Total cholesterol</b><br>(categories: normal (<5.2 mmol/L), increased (5.2-6.3 mmol/L), high (≥6,3 mmol/L) according to the NCEP ATP III classification <sup>1</sup> )         | NPU codes: NPU01566, NPU18412<br>Analysis number: 1566, 110223, 1510981, 1511230, 1622152, 1711566, 1811566                                                                                                                                                                                                                                                                                                                                                                                                                                                                                                                                                                                                                                                 |
| <b>HDL-C</b><br>(categories: low (F: <1.3, M: <1.0 mmol/L), normal (F:1.3-1.6, M: 1.0-1.6 mmol/L), high (≥1.6 mmol/L) according to the NCEP ATP III classification <sup>1</sup> ) | NPU codes: NPU01567, NPU10157<br>Analysis numbers: : 1567, 110222, 1514405, 1622153, 1711567, 1811567                                                                                                                                                                                                                                                                                                                                                                                                                                                                                                                                                                                                                                                       |
| <b>LDL-C</b><br>(categories: normal (<3.4 mmol/L), increased (3.4-4.1 mmol/L), high (≥4.1 mmol/L) according to the NCEP ATP III classification <sup>1</sup> )                     | NPU codes: AAB00101-102, NPU01568, NPU10171<br>Analysis numbers: 1568, 110221, 1514407, 1622154, 1711568, 1811568                                                                                                                                                                                                                                                                                                                                                                                                                                                                                                                                                                                                                                           |
| <b>Triglycerides</b><br>(categories: normal (<1.7 mmol/L), increased (1.7-2.3 mmol/L), high (≥2.3 mmol/L) according to the NCEP ATP III classification <sup>1</sup> )             | NPU codes: NPU03620, NPU04094<br>Analysis numbers: 3620, 4094, 110224, 1511285, 1622151, 1713620, 1813620                                                                                                                                                                                                                                                                                                                                                                                                                                                                                                                                                                                                                                                   |
| <b>Non-fasting glucose</b><br>(categories: normal (<7.8 mmol/L), prediabetes (7.8-11.0 mmol/L), diabetes (>11.0 mmol/L) according to ADA <sup>2</sup> )                           | NPU codes: AAA00056, AAA00303, AAA00311, AAA00314, NPU02187, NPU02192, NPU04093, NPU08520-67, NPU08869-8916, NPU10063-113, NPU21531, NPU21533, NPU22070-89, NPU22095, NPU22099-126, NPU27412<br>Analysis numbers: 2187, 2192, 8544-67, 8904, 8909, 8914, 8916, 10065, 22127, 110303, 110317, 110320-21, 110323, 110607, 110611, 110615, 110624, 111624-25, 112089, 112196, 114301-12, 114341-84, 116880, 122241-44, 1510941, 1511501-49, 1511632-80, 1523098, 1610143-45, 1610424, 1610537, 1610541-43, 1610633-34, 1610640, 1612192, 1616571-83, 1616590-624, 1616636, 1710312, 1710316, 1710322, 1712187, 1712192, 1810302, 1810308-09, 1810311-12, 1810316, 1810322, 1812187, 1817015, 1817017-18, 1817229-53, 1817331-32, 1817349, 1817395-414, 1817425 |
| <b>Fasting glucose</b><br>(categories: normal (<5.6 mmol/L), prediabetes (5.6-6.9 mmol/L), diabetes (>6.9 mmol/L) according to ADA <sup>2</sup> )                                 | NPU codes: DNK35842, NPU02193, NPU02195, NPU08509, NPU08972, NPU22069<br>Analysis numbers: 22069, 112069, 112195, 113016, 114325, 1511500, 1511631, 1511700, 1525071, 1610134, 1610823, 1616560, 1616635, 1712188, 1812188, 1812195, 1817225                                                                                                                                                                                                                                                                                                                                                                                                                                                                                                                |
| <b>HbA1c</b><br>(categories: normal (≤5.6%), prediabetes (5.7-6.4%), diabetes (≥6.5%) according to ADA <sup>2</sup> )                                                             | NPU codes: AAA00091-92, NPU02307, NPU03835, NPU27300<br>Analysis number: 153, 154, 159, 3835, 110285, 113835, 114835, 1510994, 1510996, 1512155, 1610135, 1613835, 1712307, 1713835, 1812307, 1817295                                                                                                                                                                                                                                                                                                                                                                                                                                                                                                                                                       |

Abbreviations: NPU= Nomenclature for Properties and Units, HDL-C=High-Density Lipoprotein Cholesterol, LDL-C=Low-Density Lipoprotein Cholesterol, NCEP=National Cholesterol Education Program, ATP=Adult Treatment Panel, HbA1c= Hemoglobin A1c, ADA=American Diabetes Association,

**eTable 2: List of disease categories and associated ICD-8 and ICD-10 codes.**

| Disease category                                          | ICD codes                                                                           |
|-----------------------------------------------------------|-------------------------------------------------------------------------------------|
| <b>Schizophrenia<sup>a</sup></b>                          | ICD-8: 295.x9 excl. 295.79<br>ICD-10: F20                                           |
| Paranoid subtype                                          | ICD-10: F20.0                                                                       |
| <b>Schizoaffective disorders<sup>a</sup></b>              | ICD-8: 295.79, 296.89<br>ICD-10: F25                                                |
| <b>Other schizophrenia spectrum disorders<sup>a</sup></b> | ICD-8: 297, 298.29-298.99, 299.04, 299.05, 299.09, 301.83<br>ICD-10: F21-24, F28-29 |
| <b>Bipolar disorders<sup>a</sup></b>                      | ICD-8: 296.19, 296.39, 298.19<br>ICD-10: F30-31                                     |
| <b>Other affective disorders<sup>a</sup></b>              | ICD-8: 296.99, 301.19<br>ICD-10: F34, F38-39                                        |
| <b>Depression (single and recurrent)<sup>a</sup></b>      | ICD-8: 296.09, 296.29, 298.09, 300.49<br>ICD-10: F32-33                             |
| <b>Personality disorders<sup>a</sup></b>                  | ICD-8: 301.x9 excl. 301.19, 301.80, 301.81, 301.82, 301.84<br>ICD-10: F60           |
| <b>Substance abuse<sup>a</sup></b>                        | ICD-8: 291.x9, 294.39, 303.x9, 303.20, 303.28, 303.90, 304.x9<br>ICD-10: F10-19     |
| <b>ADHD<sup>a</sup></b>                                   | ICD-8: 308.01<br>ICD-10: F90                                                        |
| <b>Suicide attempts<sup>b</sup></b>                       | ICD-8: E950-959<br>ICD-10: X60-84, T36-50, T52-60, S51, S55, S59, S61, S65, S69     |
| <b>Diabetes<sup>c</sup></b>                               | ICD-8: 249, 250<br>ICD-10: E10-14, H36.0, O24 excl. O24.4                           |
| <b>Dyslipidemia</b>                                       | ICD-8: 272.00, 279.00, 279.01<br>ICD-10: E78                                        |
| <b>Obesity</b>                                            | ICD-8: 277<br>ICD-10: E66                                                           |

Abbreviations: ICD=International Classification of Disease, ADHD=Attention Deficit Hyperactivity Disorder.

<sup>a</sup> Defined according to ICD-codes for mental disorders used by Pedersen *et al* 2014 <sup>3</sup>.

<sup>b</sup> Defined as described in previous studies <sup>4,5</sup>.

<sup>c</sup> Defined by the ICD-codes used by the National Diabetes Register <sup>6</sup>.

**eTable 3: List of drugs and associated ATC-codes.**

| <b>Drugs</b>                     | <b>ATC-codes</b>                                                                                           |
|----------------------------------|------------------------------------------------------------------------------------------------------------|
| <b>Antipsychotics</b>            | N05A excl. N05AN                                                                                           |
| First-generation antipsychotics  | N05AA01-04, N05AB02-04, N05AC01-02, N05AC04, N05AD01, N05AD05-06, N05AD08, N05AF01, N05AF03-05, N05AG02-03 |
| Second-generation antipsychotics | N05AD03, N05AE03-04, N05AH01 - 05, N05AL01, N05AL05, N05AX08, N05AX12-13                                   |
| <b>Antidepressants</b>           | N06A                                                                                                       |
| <b>Benzodiazepines</b>           | N03AE, N05BA, N05CD, N05CF                                                                                 |
| <b>Antidiabetic drugs</b>        | A10                                                                                                        |
| Metformin                        | A10BA02                                                                                                    |
| <b>Antiobesity preparations</b>  | A08                                                                                                        |
| <b>Lipid-lowering drugs</b>      | C10                                                                                                        |

Abbreviations: ATC= Anatomical Therapeutic Chemical

**eTable 4: Baseline characteristics for schizophrenia patients with and without metabolic blood tests.**

| Characteristic                                                                                               | With metabolic blood test(s) | Without metabolic blood test(s) | Total              | P Value |
|--------------------------------------------------------------------------------------------------------------|------------------------------|---------------------------------|--------------------|---------|
| <b>No. (%)</b>                                                                                               | 1,040 (42.4)                 | 1,412 (57.6)                    | 2,452 (100)        | <0.001  |
| <b>Female, No. (%)</b>                                                                                       | 455 (43.8)                   | 580 (41.1)                      | 1,035 (42.2)       | 0.19    |
| <b>Primary education as highest completed level, No. (%) (n=2,402)</b>                                       | 640 (63.0)                   | 938 (67.7)                      | 1,578 (65.7)       | 0.02    |
| <b>Age at first schizophrenia diagnosis, median (IQR), y</b>                                                 | 25.7 (21.9-33.6)             | 27.4 (22.3-36.2)                | 26.7 (22.1-35.1)   | <0.001  |
| <b>Inpatient at first schizophrenia diagnosis, No. (%)</b>                                                   | 424 (40.8)                   | 501 (35.5)                      | 925 (37.7)         | 0.008   |
| <b>Paranoid subtype at first schizophrenia diagnosis, No. (%)</b>                                            | 590 (56.7)                   | 733 (51.9)                      | 1,323 (54.0)       | 0.02    |
| <b>Age at first psychiatric diagnosis, median (IQR), y</b>                                                   | 22.7 (19.0-29.1)             | 23.6 (19.6-30.4)                | 23.2 (19.4-29.8)   | 0.003   |
| <b>Time since first psychiatric diagnosis, median (IQR), y</b>                                               | 1.6 (0-6.3)                  | 1.8 (0-6.0)                     | 1.7 (0-6.1)        | 0.71    |
| <b>Previous psychiatric diagnoses, No. (%)</b>                                                               |                              |                                 |                    |         |
| Substance abuse                                                                                              | 325 (31.3)                   | 434 (30.7)                      | 759 (31.0)         | 0.79    |
| Depression                                                                                                   | 369 (35.5)                   | 385 (27.3)                      | 754 (30.8)         | <0.001  |
| Other schizophrenia spectrum disorder                                                                        | 325 (31.3)                   | 425 (30.1)                      | 750 (30.6)         | 0.54    |
| Personality disorder                                                                                         | 252 (24.2)                   | 399 (28.3)                      | 651 (26.6)         | 0.03    |
| Suicide attempt                                                                                              | 280 (26.9)                   | 327 (23.2)                      | 607 (24.8)         | 0.03    |
| Bipolar disorder                                                                                             | 59 (5.7)                     | 50 (3.5)                        | 109 (4.5)          | 0.01    |
| Schizoaffective disorder                                                                                     | 42 (4.0)                     | 45 (3.2)                        | 87 (3.6)           | 0.26    |
| ADHD                                                                                                         | 56 (5.4)                     | 24 (1.7)                        | 80 (3.3)           | <0.001  |
| <b>Previous antipsychotic treatment, No. (%)</b>                                                             | 615 (59.1%)                  | 858 (60.8%)                     | 1,473 (60.1%)      | 0.42    |
| <b>Total amount of antipsychotics before first-time schizophrenia diagnosis, median (IQR), DDD (n=1,473)</b> | 136.0 (26.3-715.5)           | 149.2 (30.0-689.3)              | 142.8 (28.0-699.2) | 0.51    |
| <b>Previous use of antidepressants, No. (%)</b>                                                              | 692 (66.5)                   | 910 (64.5)                      | 1,602 (65.3)       | 0.28    |

| Characteristic                                                | With metabolic blood test(s) | Without metabolic blood test(s) | Total        | P Value |
|---------------------------------------------------------------|------------------------------|---------------------------------|--------------|---------|
| <b>Previous use of benzodiazepines, No. (%)</b>               | 495 (47.6)                   | 750 (53.1)                      | 1,245 (50.8) | 0.007   |
| <b>Previous metabolic diagnoses and/or treatment, No. (%)</b> |                              |                                 |              |         |
| Obesity                                                       | 53 (5.1)                     | 39 (2.8)                        | 92 (3.8)     | 0.003   |
| Diabetes                                                      | 23 (2.2)                     | 18 (1.3)                        | 41 (1.7)     | 0.07    |
| Dyslipidemia                                                  | 8 (0.8)                      | 6 (0.4)                         | 14 (0.6)     | 0.26    |
| Antiobesity preparations                                      | 59 (5.7)                     | 93 (6.6)                        | 152 (6.2)    | 0.35    |
| Antidiabetic drugs <sup>a</sup>                               | 28 (2.7)                     | 21 (1.5)                        | 49 (2.0)     | 0.04    |
| Lipid-lowering drugs                                          | 22 (2.1)                     | 14 (1.0)                        | 36 (1.5)     | 0.02    |

Abbreviations: IQR= Interquartile range, ADHD=Attention Deficit Hyperactivity Disorder, DDD=Defined Daily Dose.

<sup>a</sup> Metformin-prescriptions redeemed by women aged 20-39 years were excluded.

**eTable 5: Baseline characteristics for people with schizophrenia with baseline metabolic blood tests by previous antipsychotic drug prescription(s).**

| Characteristic                                                         | Without previous antipsychotic drugs | With previous antipsychotic drugs | Total            | p value |
|------------------------------------------------------------------------|--------------------------------------|-----------------------------------|------------------|---------|
| <b>No. (%)</b>                                                         | 425 (40.9)                           | 615 (59.1)                        | 1,040 (100)      | <0.001  |
| <b>Female, No. (%)</b>                                                 | 161 (37.9)                           | 294 (47.8)                        | 455 (43.8)       | 0.002   |
| <b>Primary education as highest completed level, No. (%) (n=1,016)</b> | 251 (60.3)                           | 389 (64.8)                        | 640 (63.0)       | 0.14    |
| <b>Age at first schizophrenia diagnosis, median (IQR), y</b>           | 24.6 (21.7-30.8)                     | 27.0 (22.1-35.2)                  | 25.7 (21.9-33.6) | <0.001  |
| <b>Inpatient at first schizophrenia diagnosis, No. (%)</b>             | 167 (39.3)                           | 257 (41.8)                        | 424 (40.8)       | 0.42    |
| <b>Paranoid subtype at first schizophrenia diagnosis, No. (%)</b>      | 215 (50.6)                           | 375 (61.0)                        | 590 (56.7)       | 0.001   |
| <b>Age at first psychiatric diagnosis, median (IQR), y</b>             | 23.1 (19.9-29.2)                     | 22.2 (18.3-29.1)                  | 22.7 (19.0-29.1) | 0.009   |
| <b>Time since first psychiatric diagnosis, median (IQR), y</b>         | 0.1 (0-2.1)                          | 3.3 (0.6-8.1)                     | 1.6 (0-6.3)      | <0.001  |
| <b>Previous psychiatric diagnoses, No. (%)</b>                         |                                      |                                   |                  |         |
| Substance abuse                                                        | 86 (20.2)                            | 239 (38.9)                        | 325 (31.3)       | <0.001  |
| Depression                                                             | 99 (23.3)                            | 270 (43.9)                        | 369 (35.5)       | <0.001  |
| Other schizophrenia spectrum disorder                                  | 69 (16.2)                            | 256 (41.6)                        | 325 (31.3)       | <0.001  |
| Personality disorder                                                   | 56 (13.2)                            | 196 (31.9)                        | 252 (24.2)       | <0.001  |
| Suicide attempt                                                        | 56 (13.2)                            | 224 (36.4)                        | 280 (26.9)       | <0.001  |
| ADHD                                                                   | 13 (3.1)                             | 43 (7.0)                          | 56 (5.4)         | 0.006   |
| <b>Previous use of antidepressants, No. (%)</b>                        | 218 (51.3)                           | 474 (77.1)                        | 692 (66.5)       | <0.001  |
| <b>Previous use of benzodiazepines, No. (%)</b>                        | 104 (24.5)                           | 391 (63.6)                        | 495 (47.6)       | <0.001  |

Abbreviations: IQR= Interquartile range, ADHD=Attention Deficit Hyperactivity Disorder.

**eTable 6: Baseline characteristics for people with schizophrenia with baseline metabolic blood tests by gender and previous antipsychotic drug prescription(s).**

| Characteristic                                                        | Males                       |                          |                  |                | Females                     |                          |                  |                | Overall <i>p</i> value* |
|-----------------------------------------------------------------------|-----------------------------|--------------------------|------------------|----------------|-----------------------------|--------------------------|------------------|----------------|-------------------------|
|                                                                       | Without antipsychotic drugs | With antipsychotic drugs | Total            | <i>p</i> value | Without antipsychotic drugs | With antipsychotic drugs | Total            | <i>p</i> value |                         |
| <b>No. (%)</b>                                                        | 264 (45.1)                  | 321 (54.9)               | 585 (100)        | 0.02           | 161 (35.4)                  | 294 (64.6)               | 455 (100)        | <0.001         | <0.001                  |
| <b>Primary education as highest completed level, No. (%) (n=1016)</b> | 154 (60.2)                  | 215 (68.9)               | 369 (65.0)       | 0.03           | 97 (60.6)                   | 174 (60.4)               | 271 (60.5)       | 0.97           | 0.14                    |
| <b>Age at first schizophrenia diagnosis, median (IQR), y</b>          | 25.0 (22.1-30.7)            | 28.7 (22.6-35.8)         | 26.8 (22.4-33.8) | <0.001         | 23.9 (21.2-31.1)            | 25.2 (21.8-33.8)         | 24.6 (21.5-33.1) | 0.06           | 0.02                    |
| <b>Inpatient at first schizophrenia diagnosis, No. (%)</b>            | 109 (41.3)                  | 140 (43.6)               | 249 (42.6)       | 0.57           | 58 (36.0)                   | 117 (39.8)               | 175 (38.5)       | 0.43           | 0.18                    |
| <b>Paranoid subtype at first schizophrenia diagnosis, No. (%)</b>     | 133 (50.4)                  | 213 (66.4)               | 346 (59.2)       | <0.001         | 82 (50.9)                   | 162 (55.1)               | 244 (53.6)       | 0.39           | 0.08                    |
| <b>Age at first psychiatric diagnosis, median (IQR), y</b>            | 24.0 (20.1-29.4)            | 23.7 (19.0-30.5)         | 23.9 (19.5-30.1) | 0.51           | 22.1 (19.6-28.8)            | 21.1 (17.6-27.0)         | 21.6 (18.5-27.2) | 0.01           | <0.001                  |
| <b>Time since first psychiatric diagnosis, median (IQR), y</b>        | 0.04 (0-1.8)                | 2.5 (0.4-7.4)            | 1.0 (0-5.3)      | <0.001         | 0.2 (0-2.3)                 | 4.0 (1.1-8.4)            | 2.4 (0.2-6.8)    | <0.001         | <0.001                  |
| <b>Prior psychiatric diagnoses, No. (%)</b>                           |                             |                          |                  |                |                             |                          |                  |                |                         |
| Substance abuse                                                       | 65 (24.6)                   | 163 (50.8)               | 228 (39.0)       | <0.001         | 21 (13.0)                   | 76 (25.9)                | 97 (21.3)        | 0.001          | <0.001                  |
| Depression                                                            | 46 (17.4)                   | 103 (32.1)               | 149 (25.5)       | <0.001         | 53 (32.9)                   | 167 (56.8)               | 220 (48.4)       | <0.001         | <0.001                  |
| Other                                                                 | 46 (17.4)                   | 137 (42.7)               | 183 (31.3)       | <0.001         | 23 (14.3)                   | 119 (40.5)               | 142 (31.2)       | <0.001         | 0.98                    |



| Characteristic                                                                             | Males                       |                          |            | p value | Females                     |                          |            | p value | Overall p value* |
|--------------------------------------------------------------------------------------------|-----------------------------|--------------------------|------------|---------|-----------------------------|--------------------------|------------|---------|------------------|
|                                                                                            | Without antipsychotic drugs | With antipsychotic drugs | Total      |         | Without antipsychotic drugs | With antipsychotic drugs | Total      |         |                  |
| schizophrenia spectrum disorder                                                            |                             |                          |            |         |                             |                          |            |         |                  |
| Personality disorder                                                                       | 27 (10.2)                   | 61 (19.0)                | 88 (15.0)  | 0.003   | 29 (18.0)                   | 135 (45.9)               | 164 (36.0) | <0.001  | <0.001           |
| Suicide attempt                                                                            | 30 (11.4)                   | 92 (28.7)                | 122 (20.9) | <0.001  | 26 (16.2)                   | 132 (44.9)               | 158 (34.7) | <0.001  | <0.001           |
| ADHD                                                                                       | 9 (3.4)                     | 30 (9.4)                 | 39 (6.7)   | 0.004   | 4 (2.5)                     | 13 (4.4)                 | 17 (3.7)   | 0.30    | 0.04             |
| <b>Total amount (DDD) of antipsychotics prior to first schizophrenia diagnosis (n=615)</b> | NA                          | 126.0 (26.7-655.5)       | NA         | NA      | NA                          | 146.6 (26.3-900.0)       | NA         | NA      | 0.39             |
| <b>Prior non-antipsychotic treatment, No. (%)</b>                                          |                             |                          |            |         |                             |                          |            |         |                  |
| Antidepressants                                                                            | 116 (43.9)                  | 220 (68.5)               | 336 (57.4) | <0.001  | 102 (63.4)                  | 254 (86.4)               | 356 (78.2) | <0.001  | <0.001           |
| Benzodiazepines                                                                            | 59 (22.4)                   | 179 (55.8)               | 238 (40.7) | <0.001  | 45 (28.0)                   | 212 (72.1)               | 257 (56.5) | <0.001  | <0.001           |

Abbreviations: IQR=Interquartile range, ADHD=Attention Deficit Hyperactivity Disorder, DDD=Defined daily dose, NA=Not available.

\* p value for the overall differences between male and female.

## Reference List

- 1 Third Report of the National Cholesterol Education Program (NCEP) Expert Panel on Detection, Evaluation, and Treatment of High Blood Cholesterol in Adults (Adult Treatment Panel III) final report. *Circulation* 2002;106:3143-3421.
- 2 Diagnosis and classification of diabetes mellitus. *Diabetes Care* 2014;37 Suppl 1:S81-S90.
- 3 Pedersen CB, Mors O, Bertelsen A et al. A comprehensive nationwide study of the incidence rate and lifetime risk for treated mental disorders. *JAMA Psychiatry* 2014;71:573-581.
- 4 Pedersen MG, Mortensen PB, Norgaard-Pedersen B, Postolache TT. Toxoplasma gondii infection and self-directed violence in mothers. *Arch Gen Psychiatry* 2012;69:1123-1130.
- 5 Webb RT, Antonsen S, Mok PL, Agerbo E, Pedersen CB. National Cohort Study of Suicidality and Violent Criminality among Danish Immigrants. *PLoS One* 2015;10:e0131915.
- 6 Carstensen B, Kristensen JK, Marcussen MM, Borch-Johnsen K. The National Diabetes Register. *Scand J Public Health* 2011;39:58-61.
